# Supplementary material for: A conserved Polϵ binding module in Ctf18-RFC is required for S-phase checkpoint activation downstream of Mec1
Source: PubMed Central journal article supplement (PMC4605302; doi:10.1093/nar/gkv799), 2015-10-10
Supplement: supp_gkv799_nar-01503-h-2015-File008.pdf [file supp_gkv799_nar-01503-h-2015-File008.pdf]

1 **Legends to Supplementary Figures**

2 **Supplementary Figure S1**

3 Ctf18-RFC co-purifies with DNA polymerase epsilon. **(A)** Ctf18-TAP was  
4 purified from 4 litres of cell culture, and the final material was resolved in one  
5 lane of a 4-12% gradient gel, which was then cut into 60 bands, before  
6 analysis of the protein content of each band by mass spectrometry. The  
7 histograms show the number of detected peptides per band of the gel, for  
8 each of the indicated proteins, with Mascot scores indicated in brackets and  
9 bold. **(B)** Summary of mass spectrometry data after two-step purifications  
10 (IgG-Sepharose and release of bound material with TEV protease, then  
11 Calmodulin-affinity resin) of cell extracts from *DPB2-TAP* and control strains.  
12 For each protein detected in the mass spectrometry analysis, the number of  
13 spectral counts is shown for each strain, indicating that Ctf18-Dcc1-Ctf8 were  
14 specifically enriched upon purification of DNA polymerase epsilon.

15

16 **Supplementary Figure S2**

17 Ctf18 does not interact with the Dpb3 or Dpb4 subunits of Pol  $\epsilon$  in the yeast  
18 two-hybrid assay. Two-hybrid analysis was performed as in Figure 2,  
19 indicating that Ctf18-RFC did not interact in this assay with Dpb3 or Dpb4 **(A)**.  
20 As a control, we confirmed that Dpb3 and Dpb4 were able to interact with  
21 each other in the same assay **(B)**.

22

1 **Supplementary Figure S3**

2 Pol2CT interacts with itself in the yeast two-hybrid assay. The indicated  
3 fragments were tested in the yeast two-hybrid assay, as above in Figure 2A.

4

5 **Supplementary Figure S4**

6 The Pol  $\epsilon$  binding module of Ctf18-RFC comprises a conserved motif at the  
7 end of Ctf18 that interacts with Dcc1-Ctf8 and Pol2NT. **(A)** Alignment of the  
8 carboxy terminal half of Ctf18 from the indicated budding yeast species,  
9 generated as in Figure 3B. Asterisks denote 10 conserved hydrophobic  
10 residues at the end of Ctf18. **(B)** An equivalent alignment of the carboxy  
11 terminal half of Ctf18 from the indicated species (X.l. = *Xenopus laevis*; H.s =  
12 *Homo sapiens*; D.m. = *Drosophila melanogaster*; S.p. =  
13 *Schizosaccharomyces pombe*; O.s. = *Oryza sativa*; S.c. = *Saccharomyces*  
14 *cerevisiae*).

15

16 **Supplementary Figure S5**

17 Residues at the extreme carboxyl terminus of Ctf18 are important for  
18 interaction with Pol2NT and Dcc1. The indicated Ctf18 fragments were tested  
19 for their ability to interact with Pol2NT **(A)** and Dcc1 **(B)** in the two-hybrid  
20 assay, as in Figures 2 and 3.

21

22 **Supplementary Figure S6**

23 Comparison of the hydroxyurea sensitivity caused by various mutations in  
24 Ctf18-RFC. Cells were processed as for Figure 4A.

1

2 **Supplementary Figure S7**

3 Increased phosphorylation of Serine 129 of histone H2A indicates DNA  
4 damage in ctf18-2A upon release into S-phase in the presence of  
5 hydroxyurea. One of the replicates from Figure 5A was used to monitor DNA  
6 content by flow cytometry (upper panels) and  $\gamma$ -H2A by immunoblotting (lower  
7 panels). Ponceau-stained total protein provided a loading control.

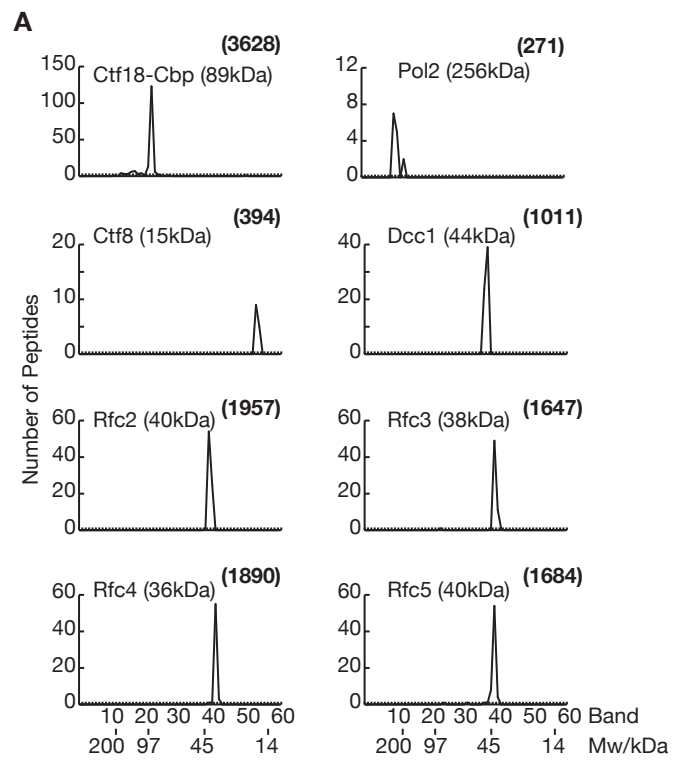

**B**

| Protein  | Mw (kDa) | Spectral counts<br>( <i>DPB2-TAP</i> ) | Spectral counts<br>( <i>Control</i> ) |
|----------|----------|----------------------------------------|---------------------------------------|
| Dpb2-TAP | 99       | 1193                                   | 11                                    |
| Dpb3     | 23       | 157                                    | 2                                     |
| Dpb4     | 22       | 218                                    | 0                                     |
| Pol2     | 256      | 4286                                   | 146                                   |
| Ctf18    | 84       | 91                                     | 6                                     |
| Dcc1     | 44       | 19                                     | 2                                     |
| Ctf8     | 15       | 25                                     | 0                                     |

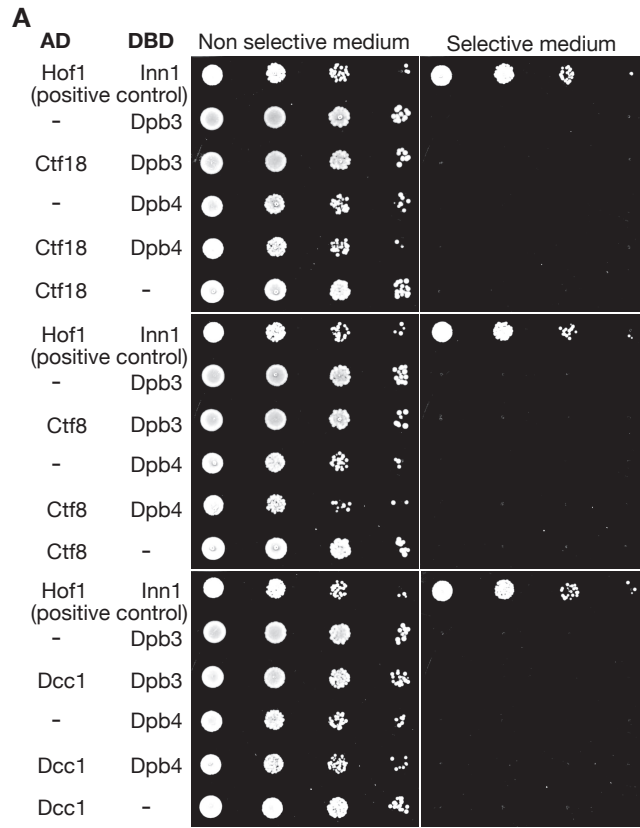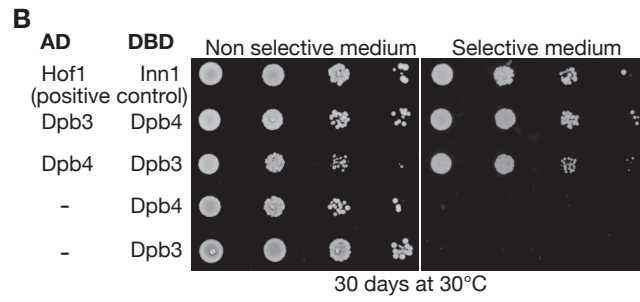

Garcia-Rodriguez Fig S3

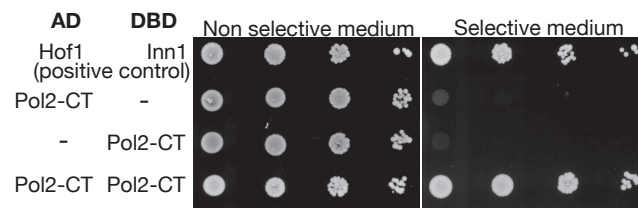



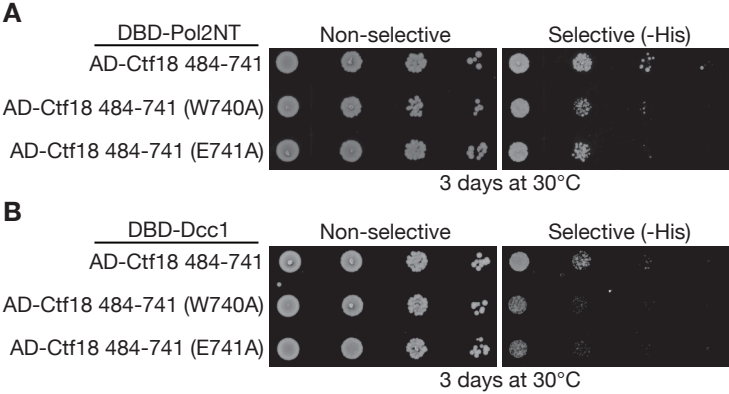





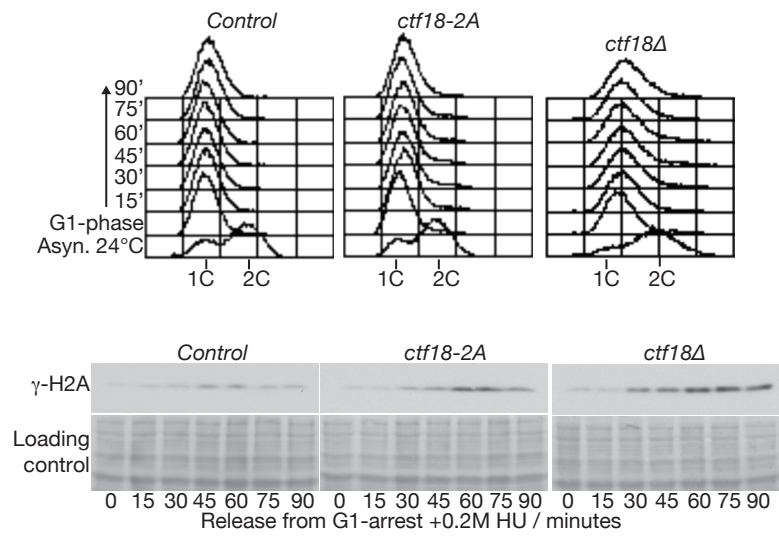

| Strain   | Genotype                                                                                                                                                                                             | Source       |
|----------|------------------------------------------------------------------------------------------------------------------------------------------------------------------------------------------------------|--------------|
| W303-1a  | <i>MATa ade2-1 ura3-1 his3-1 trp1-1 leu2-3, 112 can1-100</i>                                                                                                                                         | R. Rothstein |
| YAC53    | <i>MATa sml1Δ::HIS3 rad53Δ::ADE2</i>                                                                                                                                                                 | This study   |
| YASD375  | <i>MATa TAP-SLD5 (KanMX) pep4Δ::URA3 ADE2</i>                                                                                                                                                        | This study   |
| YCS394   | <i>MATa MCM4-5-FLAG (hphNT) leu2-3,112:: pRS305-GAL-DPB2-9myc (LEU2) GAL TIR1-9myc (klTRP1) dpb2-IAA17 (kanMX) pep4Δ::ADE2</i>                                                                       | This study   |
| YCS396   | <i>MATa MCM4-5-FLAG (hphNT) leu2-3,112:: pRS305-GAL-dpb2-NT (1-168)-9myc GAL TIR1-9myc (klTRP1) dpb2-IAA17 (kanMX) pep4Δ::ADE2</i>                                                                   | This study   |
| YCS1180  | <i>MATa MCM4-5FLAG (hphNT) pep4Δ::ADE2</i>                                                                                                                                                           | This study   |
| YGDP1970 | <i>MATa CTF18-TAP (HIS3MX) pep4Δ::URA3 ADE2</i>                                                                                                                                                      | This study   |
| YGDP1971 | <i>MATa CTF18-TAP (HIS3MX) dcc1Δ::hphNT pep4Δ::URA3 ADE2</i>                                                                                                                                         | This study   |
| YGDP1972 | <i>MATa DCC1-TAP (HIS3MX) pep4Δ::URA3 ADE2</i>                                                                                                                                                       | This study   |
| YGDP1973 | <i>MATa DCC1-TAP (HIS3MX) ctf18Δ::K.I. TRP1 pep4Δ::URA3 ADE2</i>                                                                                                                                     | This study   |
| YGDP993  | <i>MATa MCM4-5FLAG (hphNT) mrc1Δ::K.I. TRP1 pep4Δ::ADE2</i>                                                                                                                                          | This study   |
| YLG33    | <i>MATa TAP-SLD5 (KanMX) ctf18Δ::K.I. TRP1 pep4Δ::URA3 ADE2</i>                                                                                                                                      | This study   |
| YLG60    | <i>MATa trp1-901 leu2-3,112 ura3-52 his3-200 gal4Δ gal80Δ LYS2::GAL1-HIS3 GAL2-ADE2 met2::GAL7-lacZ ctf8Δ::URA3</i>                                                                                  | This study   |
| YLG63    | <i>MATa trp1-901 leu2-3,112 ura3-52 his3-200 gal4Δ gal80Δ LYS2::GAL1-HIS3 GAL2-ADE2 met2::GAL7-lacZ dcc1Δ::URA3</i>                                                                                  | This study   |
| YLG98    | <i>MATa MRC1-18MYC (K.I. TRP1) pep4Δ::URA3 ADE2</i>                                                                                                                                                  | This study   |
| YLG100   | <i>MATa MRC1-18MYC (K.I. TRP1) CTF18-TAP (HIS3MX) pep4Δ::URA3 ADE2</i>                                                                                                                               | This study   |
| YLG263   | <i>MATΔ / MATα ade2-1 / ade2-1 ura3- 1 / ura3-1 his3-1 / his3-1 trp1-1 / trp1-1 leu2-3, 112 / leu2-3,112 can1-100 / can1-100 ctf18-2A (K.I. TRP1) / CTF18 ctf4Δ::KanMX / CTF4 pep4Δ::ADE2 / PEP4</i> | This study   |
| YLG249   | <i>MATa ctf18-2A (K.I. TRP1) pep4Δ::ADE2</i>                                                                                                                                                         | This study   |
| YLG284   | <i>MATa / MATα ade2-1 / ade2-1 ura3- 1 / ura3-1 his3-1 / his3-1 trp1-1 / trp1-1 leu2-3, 112 / leu2-3,112 can1-100 / can1-100 CTF18 (K.I. TRP1) / CTF18 ctf4Δ::KanMX / CTF4 pep4Δ::ADE2 / PEP4</i>    | This study   |
| YLG292   | <i>MATa / MATα ade2-1 / ade2-1 ura3- 1 / ura3-1 his3-1 / his3-1 trp1-1 / trp1-1 leu2-3, 112 / leu2-3,112 can1-100 / can1-100 CTF18 (K.I. TRP1) / CTF18 mrc1Δ::hphNT / MRC1 pep4Δ::ADE2 / PEP4</i>    | This study   |

|         |                                                                                                                                                                                                                                                                                           |            |
|---------|-------------------------------------------------------------------------------------------------------------------------------------------------------------------------------------------------------------------------------------------------------------------------------------------|------------|
| YLG296  | <i>MATa</i> / <i>MATα</i> <i>ade2-1</i> / <i>ade2-1 ura3-1</i> / <i>ura3-1 his3-1</i> / <i>his3-1 trp1-1</i> / <i>trp1-1 leu2-3, 112</i> / <i>leu2-3, 112 can1-100</i> / <i>can1-100 ctf18-2A</i> (K.I. <i>TRP1</i> ) / <i>CTF18 mrc1Δ::hphNT</i> / <i>MRC1 pep4Δ::ADE2</i> / <i>PEP4</i> | This study |
| YLG301  | <i>MATa</i> <i>DCC1-TAP</i> ( <i>HIS3MX</i> ) <i>CTF18</i> (K.I. <i>TRP1</i> ) <i>pep4Δ::URA3 ADE2</i>                                                                                                                                                                                    | This study |
| YLG303  | <i>MATa</i> <i>DCC1-TAP</i> ( <i>HIS3MX</i> ) <i>ctf18-2A</i> (K.I. <i>TRP1</i> ) <i>pep4Δ::URA3 ADE2</i>                                                                                                                                                                                 | This study |
| YLG316  | <i>MATa</i> <i>CTF18</i> (K.I. <i>TRP1</i> )                                                                                                                                                                                                                                              | This study |
| YLG320  | <i>MATa</i> <i>ctf18-2A</i> (K.I. <i>TRP1</i> )                                                                                                                                                                                                                                           | This study |
| YLG421  | <i>MATa</i> <i>MCM4-5-FLAG</i> ( <i>hphNT</i> ) <i>ctf18Δ::K.I.TRP1</i> <i>pep4Δ::URA3 ADE2</i>                                                                                                                                                                                           | This study |
| YLG423  | <i>MATa</i> <i>MCM4-5-FLAG</i> ( <i>hphNT</i> ) <i>ctf18-2A</i> (K.I. <i>TRP1</i> ) <i>pep4Δ::URA3 ADE2</i>                                                                                                                                                                               | This study |
| YLG426  | <i>MATa</i> <i>MCM4-5FLAG</i> ( <i>hphNT</i> ) <i>CTF18</i> (K.I. <i>TRP1</i> ) <i>pep4Δ::URA3 ADE2</i>                                                                                                                                                                                   | This study |
| YLG445  | <i>MATa</i> <i>CTF18</i> (K.I. <i>TRP1</i> ) <i>ura3::3xURA3-tetO112</i> <i>leu2::tetR-GFP-LEU2 PDS1-mCherry</i> ( <i>KanMX</i> )                                                                                                                                                         | This study |
| YLG447  | <i>MATa</i> <i>ctf18-2A</i> (K.I. <i>TRP1</i> ) <i>ura3::3xURA3-tetO112</i> <i>leu2::tetR-GFP-LEU2 PDS1-mCherry</i> ( <i>KanMX</i> )                                                                                                                                                      | This study |
| YLG449  | <i>MATa</i> <i>ctf18Δ::K.I.TRP1</i> <i>ura3::3xURA3-tetO112</i> <i>leu2::tetR-GFP-LEU2 PDS1-mCherry</i> ( <i>KanMX</i> )                                                                                                                                                                  | This study |
| YVM164  | <i>MATa</i> <i>ctf18Δ::K.I.TRP1</i>                                                                                                                                                                                                                                                       | This study |
| YVM657  | <i>MATa</i> <i>CTF18-TAP</i> ( <i>HIS3MX</i> ) <i>POL2-9MYC</i> (K.I. <i>TRP1</i> ) <i>RFC4-6HA</i> (K.I. <i>TRP1</i> ) <i>pep4Δ::URA3 ADE2</i>                                                                                                                                           | This study |
| YVM738  | <i>MATa</i> <i>CTF18-TAP</i> ( <i>HIS3MX</i> ) <i>POL2-9MYC</i> (K.I. <i>TRP1</i> ) <i>RFC4-6HA</i> (K.I. <i>TRP1</i> ) <i>dcc1Δ::hphNT</i> <i>pep4Δ::URA3 ADE2</i>                                                                                                                       | This study |
| YVM740  | <i>MATa</i> <i>CTF18-TAP</i> ( <i>HIS3MX</i> ) <i>POL2-9MYC</i> (K.I. <i>TRP1</i> ) <i>RFC4-6HA</i> (K.I. <i>TRP1</i> ) <i>ctf8Δ::hphNT</i> <i>pep4Δ::URA3 ADE2</i>                                                                                                                       | This study |
| YVM850  | <i>MATa</i> <i>DCC1-TAP</i> ( <i>HIS3MX</i> ) <i>ctf18Δ::K.I.TRP1</i> <i>pep4Δ::URA3 ADE2</i>                                                                                                                                                                                             | This study |
| PJ69-4A | <i>MATa</i> <i>trp1-901 leu2-3, 112 ura3-52 his3-200 gal4Δ gal80Δ</i> <i>LYS2::GAL1-HIS3 GAL2-ADE2</i> <i>met2::GAL7-lacZ</i>                                                                                                                                                             | H. Ulrich  |

### Supplementary Table S1

Strains used in this study – all the above strains are based on the W303 background, except for the yeast two-hybrid strain PJ69-4A and its derivatives YLG60 and YLG63.

| Plasmid | Description                      | Source     |
|---------|----------------------------------|------------|
| pAD27   | Gal4 DNA binding domain-MYC-Inn1 | This study |
| pAD30   | Gal4 Activation domain-HA-Hof1   | This study |
| pGADT7  | Gal4 Activation domain-HA        | Clontech   |
| pGBKT7  | Gal4 DNA binding domain-MYC      | Clontech   |
| pHM27   | pGADT7-Mrc1                      | This study |
| pLG1    | pGADT7-Ctf18                     | This study |
| pLG2    | pGBKT7-Ctf18                     | This study |
| pLG4    | pGBKT7-Ctf8                      | This study |
| pLG6    | pGBKT7-Dcc1                      | This study |
| pLG16   | pGBKT7-Pol2 1-1256               | This study |
| pLG24   | pGADT7-Ctf18 1-116               | This study |
| pLG25   | pGADT7-Ctf18 1-374               | This study |
| pLG26   | pGADT7-Ctf18 1-494               | This study |
| pLG27   | pGADT7-Ctf18 1-595               | This study |
| pLG28   | pGADT7-Ctf18 1-657               | This study |
| pLG31   | pGADT7-Ctf18 369-741             | This study |
| pLG32   | pGADT7-Ctf18 494-741             | This study |
| pLG35   | pGADT7-Ctf18 654-741             | This study |
| pLG36   | pGADT7-Ctf18 675-741             | This study |
| pLG37   | pGADT7-Ctf18 709-741             | This study |
| pLG54   | pGBKT7-Pol2 1-227                | This study |
| pLG55   | pGBKT7-Pol2 1-396                | This study |
| pLG57   | pGBKT7-Pol2 1-933                | This study |
| pLG59   | pGBKT7-Pol2 214-1265             | This study |
| pLG60   | pGBKT7-Pol2 392-1265             | This study |
| pLG61   | pGBKT7-Pol2 627-1265             | This study |
| pLG62   | pGBKT7-Pol2 930-1265             | This study |

## Supplementary Table S2

Plasmids used in this study.
